# Supplementary material for: Lead, zinc, and chromium concentrations in acidic headwater streams in Sweden explained by chemical, climatic, and land-use variations
Source: Copernicus journal article supplement (doi:10.5194/bg-9-4323-2012), 2012-11-07

Figure 1. Modeling procedure described for partial least squares (PLS) and multiple linear regression (MLR) analysis.

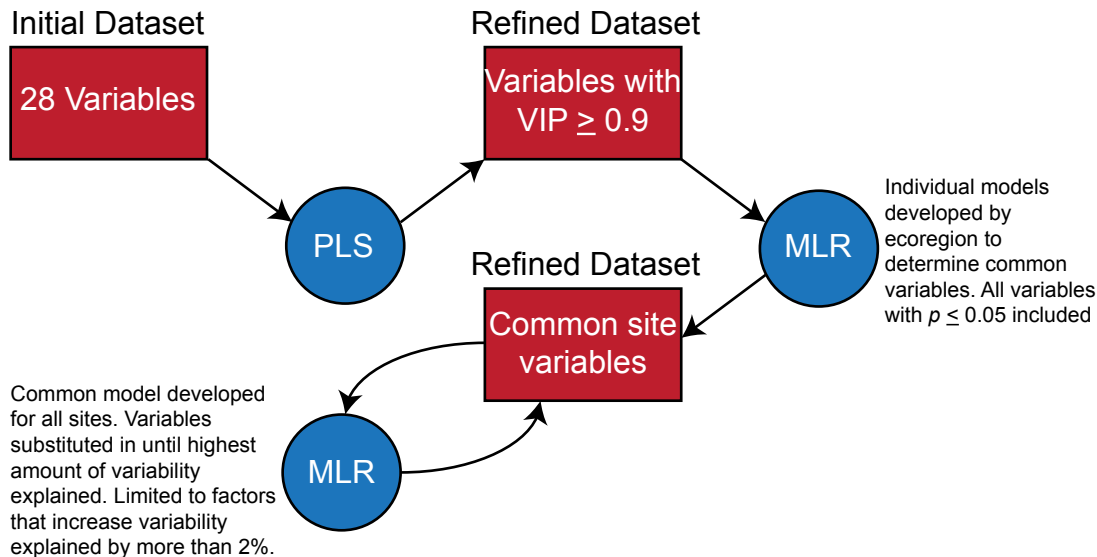

Supplement: Supplementary file 1 [file bg-9-4323-2012-supplement.pdf]
